# Supplementary material for: p53 regulates skeletal muscle mitophagy and mitochondrial quality control following denervation-induced muscle disuse
Source: PubMed Central journal article supplement — J Biol Chem. 2021 Dec 25;298(2):101540. doi: 10.1016/j.jbc.2021.101540 (PMC8790503; doi:10.1016/j.jbc.2021.101540), 2021-12-25
Supplement: mmc1.pdf [file mmc1.pdf]

# Supporting Information

**p53 regulates skeletal muscle mitophagy and mitochondrial quality control following denervation-induced muscle disuse**

Jonathan M. Memme, Ashley N. Oliveira and David A. Hood

**Table S1. List of antibodies**

| Antibody     | Manufacturer             | Catalog No.     | Molecular Weight (kDa) |
|--------------|--------------------------|-----------------|------------------------|
| A-Tublin     | Millipore-Sigma          | CP06-100UG      | 60                     |
| ATF 5        | Abcam                    | ab60126         | 31                     |
| ATF4 (CREB2) | Santa Cruz Biotechnology | SC-200          | 50                     |
| ATG 7        | Sigma-Aldrich            | A2856-25uL      | 75                     |
| Bax          | Santa Cruz Biotechnology | sc23959         | 23                     |
| Beclin 1     | Cell Signaling           | 3738S           | 60                     |
| Cathepsin D  | Santa Cruz Biotechnology | SC-6486         | 25-37                  |
| CHOP         | Santa Cruz Biotechnology | SC-7351         | 27                     |
| ClpP         | Abcam                    | ab124822        | 37                     |
| COX I        | Abcam                    | ab14705         | 39                     |
| CPN10        | Enzo Life Sciences       | ADI-SPA-110     | 10                     |
| H2B          | Cell Signaling           | 2934S           | 15                     |
| LC3 (A/B)    | Cell Signaling           | 4108S           | 14-16                  |
| LonP         | Cell Signaling           | 28020S          | 100                    |
| mtHSP70      | Enzo Life Sciences       | ADI-SPS-825-F   | 75                     |
| p53          | <i>made in house</i>     |                 | 50                     |
| p62 (SQSTM1) | Abcam                    | ab56416         | 62                     |
| Parkin       | Cell Signaling           | 4211S           | 52                     |
| PGC-1a       | Millipore-Sigma          | AB3242          | 100                    |
| PINK 1       | Santa Cruz Biotechnology | sc-33796        | 50                     |
| TFE3         | Sigma-Aldrich            | HPA023881-100UL | 72                     |
| TFEB         | Bethyl Laboratories      | A303-673A       | 50                     |
| TFEB         | My Bio Source            | MBS120432       | 50                     |
| YY1(H-10)    | Santa Cruz Biotechnology | SC-7341         | 60                     |

**Table S2. List of primer oligonucleotide sequences used in real-time quantitative PCR analysis for *mus musculus***

| Gene                                 | Organism            | Forward Primer (5'-3')          | Reverse Primer (5'-3')         |
|--------------------------------------|---------------------|---------------------------------|--------------------------------|
| <i>PGC-1a</i><br>( <i>Ppargc1a</i> ) | <i>Mus musculus</i> | TTC CAC CAA GAG CAA GTA T       | CGC TGT CCC ATG AGG TAT T      |
| <i>Atf4</i>                          | <i>Mus musculus</i> | GCC GGT TTA AGT TGT GTG CT      | CTG GAT TCG AGG AAT GTG CT     |
| <i>Atf5</i>                          | <i>Mus musculus</i> | TGG AGC GGG AGA TCC AGT A       | GAC GCT GGA GAC AGA CGT ACA    |
| <i>Tfeb</i>                          | <i>Mus musculus</i> | AGC TCC AAC CCG AGA AAG AGT TTG | CGT TCA GGT GGC TGC TAG AC     |
| <i>Lc3</i><br>( <i>Maplc3a</i> )     | <i>Mus musculus</i> | GCT TGC AGC TCA ATG CTA AC      | CCT GCG AGG CAT AAA CCA TGT A  |
| <i>p62</i><br>( <i>Sqstm1</i> )      | <i>Mus musculus</i> | TGT GGT GGG AAC TCG CTA TAA     | CAG CGG CTA TGA GAG AAG CTA T  |
| <i>Parkin</i><br>( <i>Park2</i> )    | <i>Mus musculus</i> | GTC TGC AAT TTG GTT TGG AGT A   | GCA TCA TGG GAT TGT CTC TTA AA |
| <i>B2m</i>                           | <i>Mus musculus</i> | GGT CTT TCT GGT GCT TGT CT      | TAT GTT CGG CTT CCC ATT CT     |
| <i>Gapdh</i>                         | <i>Mus musculus</i> | AAC ACT GAG CAT CTC CCT CA      | GTG GGT GCA GCG AAC TTT AT     |

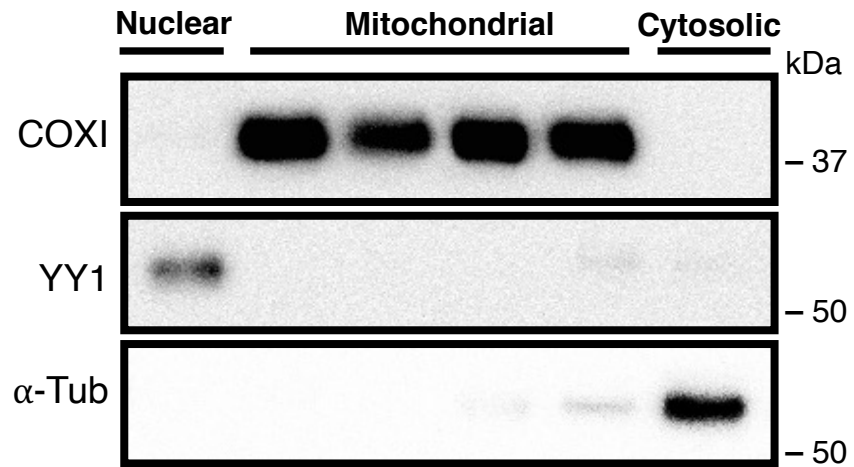

**Figure S1.** Nuclear, mitochondrial and cytosolic fraction purity in 7 day control and denervated gastrocnemius muscle.

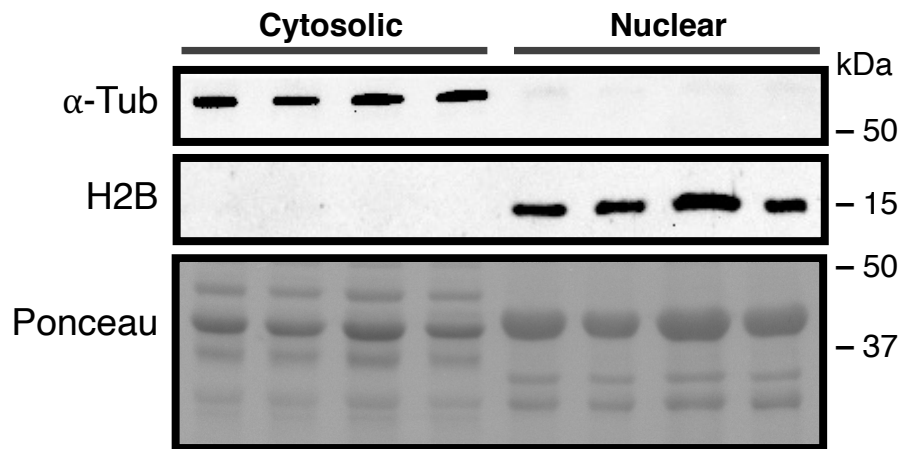

**Figure S2.** Nuclear and cytosolic fraction purity in 1 day control and denervated gastrocnemius muscle.

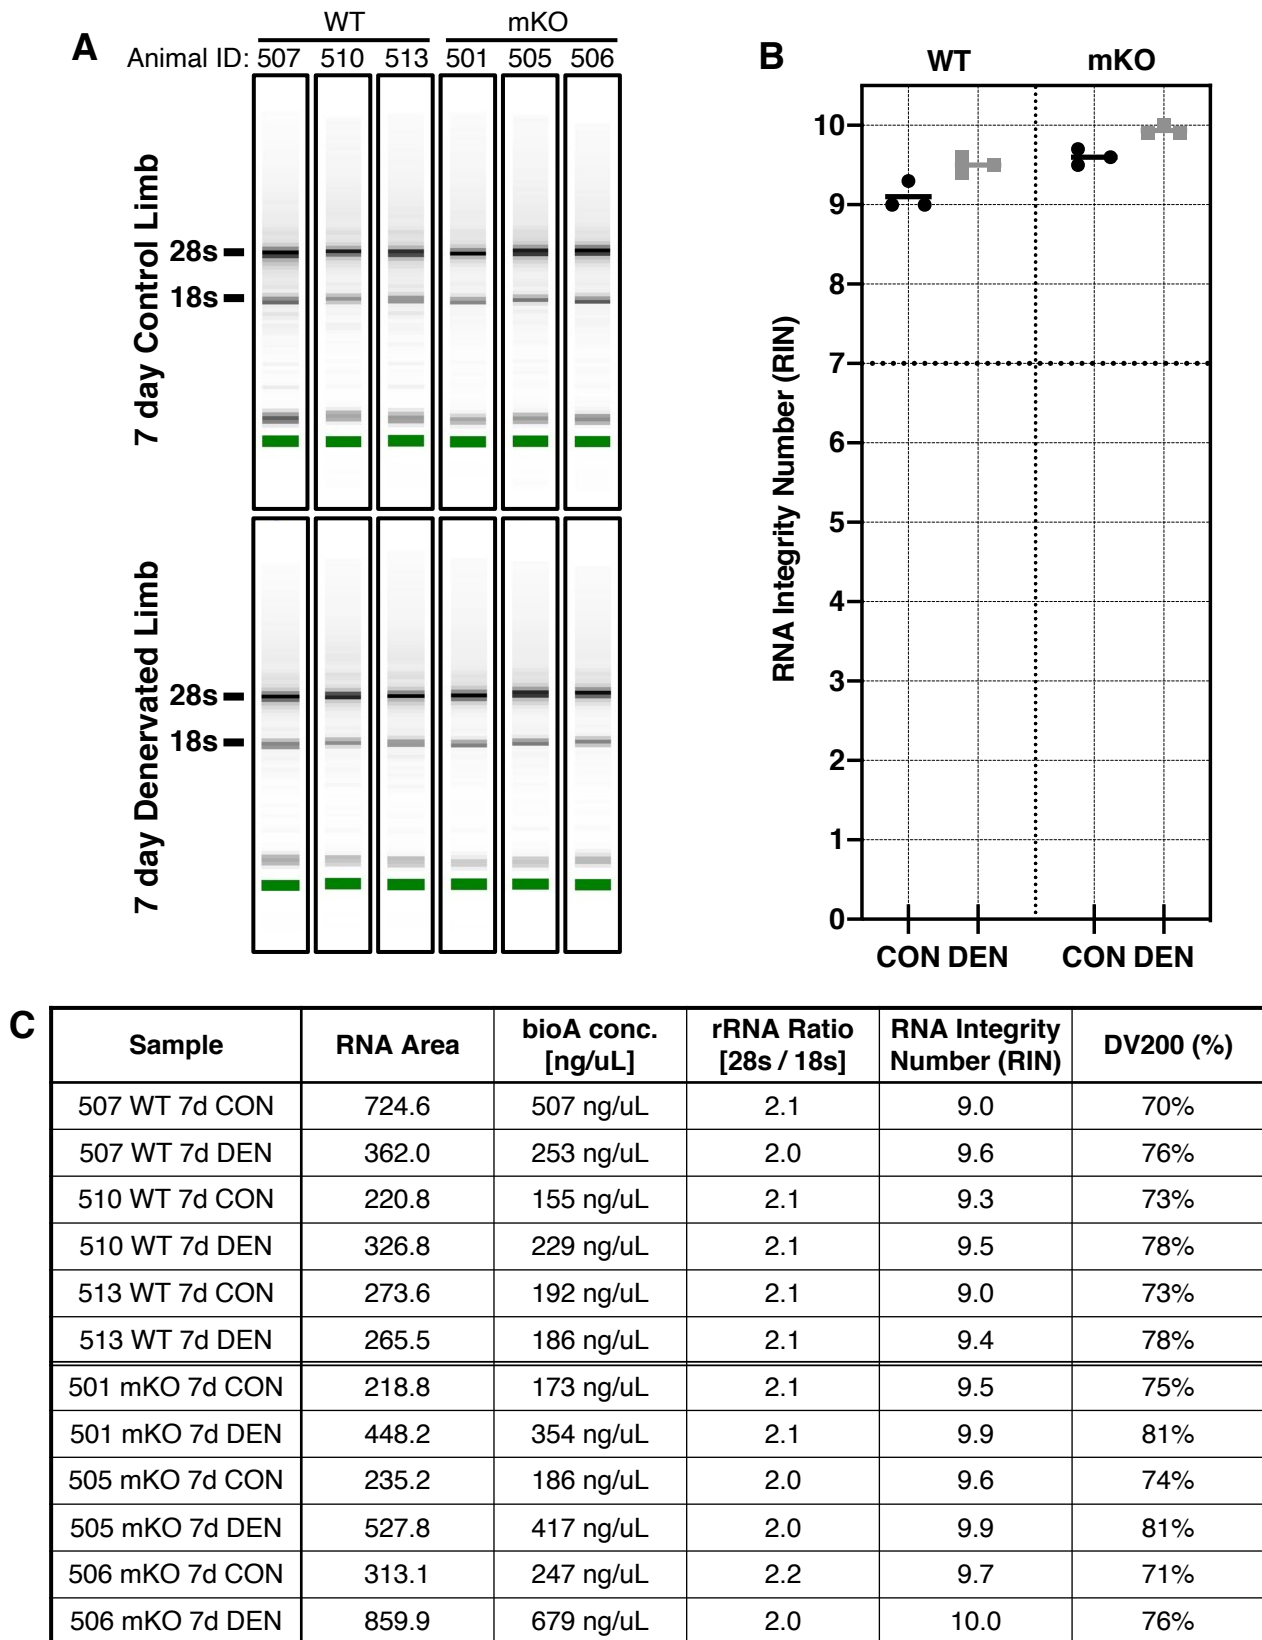

**Figure S3.** Bioanalyzer quality control report for mRNA and cDNA samples prepared for RNA sequencing. **(A)** Representative RIN tracings from all samples used in RNAseq analysis. **(B)** RNA integrity was similar for across all samples, with thresholds set at rRNA ratio  $\geq 2.0$ ; RIN  $\geq 7$ ; and DV200%  $\geq 70\%$  **(C)**.

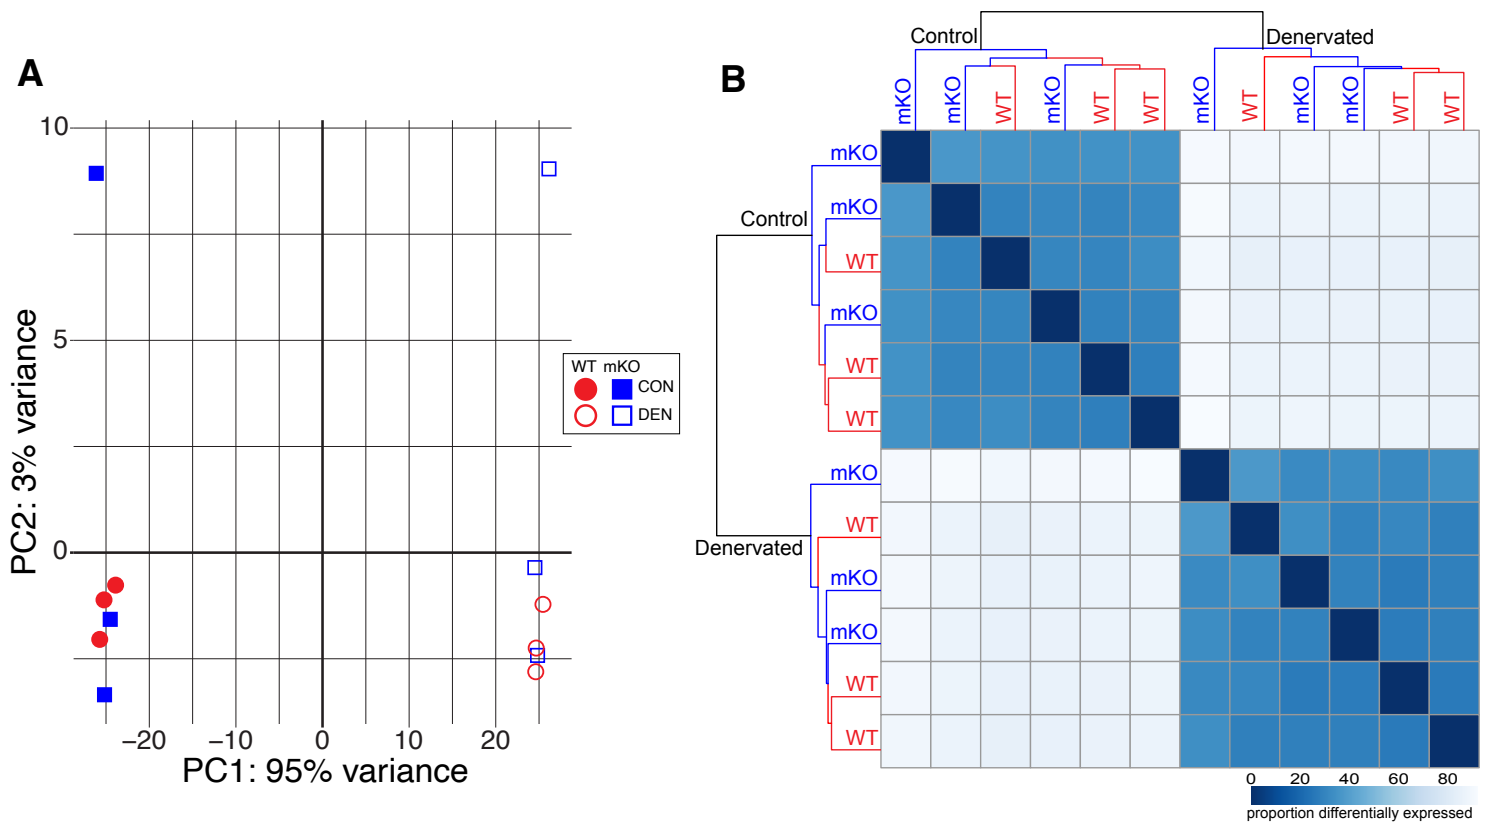

**Figure S4.** Principal-Component Analysis. **(A)** Principal-component 1 appears to segregate data based on denervation, whereas the principal-component 2 separates data based on genotype, albeit to a much lesser degree of variance between samples. **(B)** The sample clustering heatmap for visualization of sample similarity via the number of differentially expressed transcripts in pairwise comparisons.

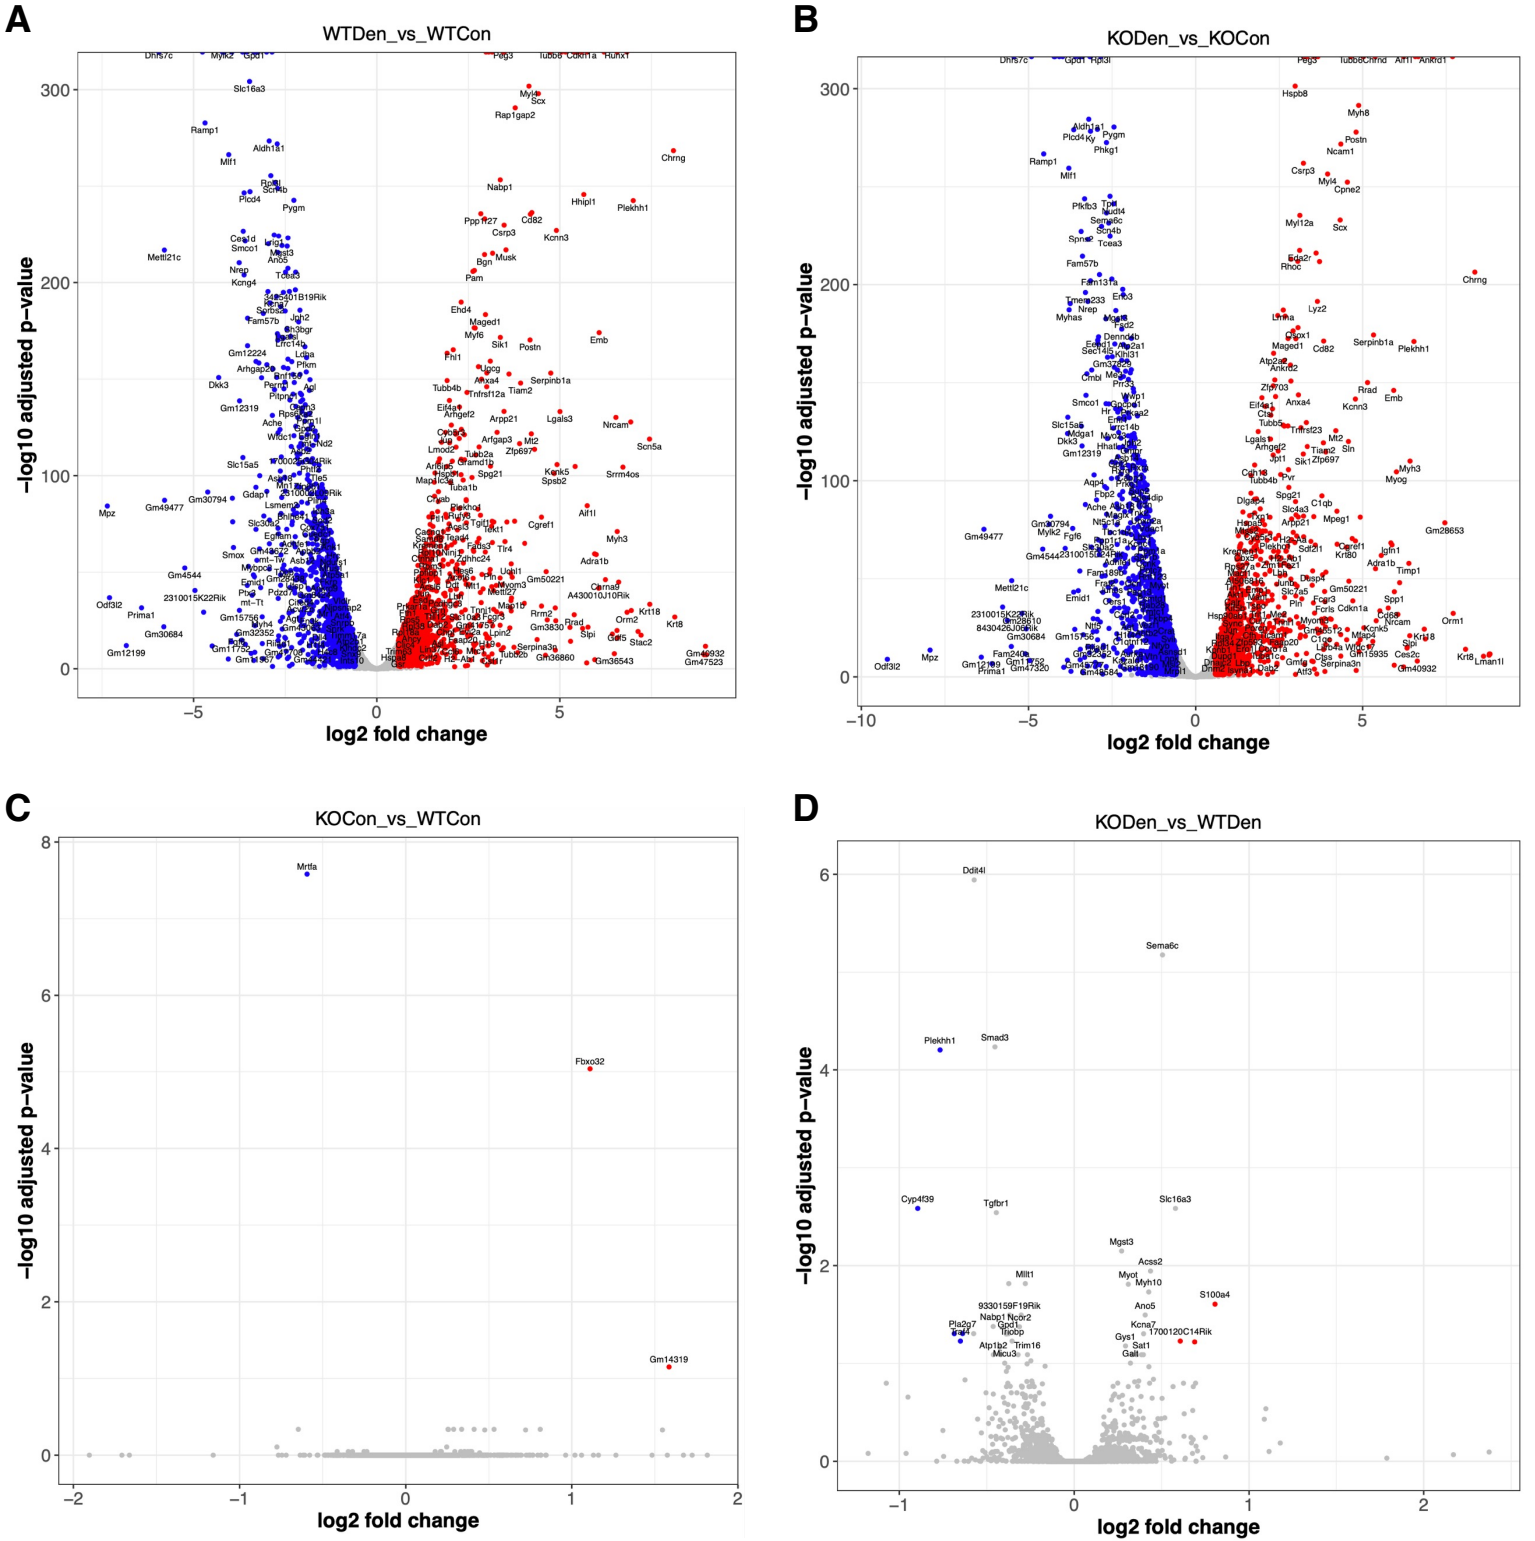

**Figure S5.** Volcano plots for the four comparisons: **(A)** WT CON vs DEN; **(B)** mKO CON vs DEN; **(C)** WT CON vs mKO CON; and **(D)** WT DEN vs mKO DEN. Plots were generated using R v.3.6.1, using the differential gene expression results obtained from DESeq2. The genes with less than 3 FPKM in both comparison groups from each result set were filtered out before plotting. Genes which had  $abs(\text{Log}_2\text{FC}) > 0.58$  ( $=1.5x$  FC) and  $\text{padj}$  (FDR)  $< 0.1$  were colored red or blue depending on the direction of the fold change.

**Table S3.** RNAseq results for select genes involved in mitochondrial biogenesis, autophagy/mitophagy, lysosomal biogenesis, the UPR<sup>mt</sup> and atrogenes/apoptotic factors along with corresponding heat map depicting log<sub>2</sub>FC (Scale is -2 to +2, blue to red). Only genes with p-value and FDR < 0.05 were considered differentially expressed

| Gene Common Name / Description                                                | Gene     | DeSeq |       |       |         |      |       |                     |      |       | EdgeR                |       |       |         |       |       |         |     |       |                     |     |       |                      |     |  |
|-------------------------------------------------------------------------------|----------|-------|-------|-------|---------|------|-------|---------------------|------|-------|----------------------|-------|-------|---------|-------|-------|---------|-----|-------|---------------------|-----|-------|----------------------|-----|--|
|                                                                               |          | WT    |       |       | mKO     |      |       | WT 7d Con vs 7d Den |      |       | mKO 7d Con vs 7d Den |       |       | WT      |       |       | mKO     |     |       | WT 7d Con vs 7d Den |     |       | mKO 7d Con vs 7d Den |     |  |
|                                                                               |          | logFC | logFC | logFC | p-value | FDR  | logFC | p-value             | FDR  | logFC | p-value              | FDR   | logFC | p-value | FDR   | logFC | p-value | FDR | logFC | p-value             | FDR | logFC | p-value              | FDR |  |
| PGC-1a                                                                        | Ppargc1a |       |       | -0.68 | 0.00    | 0.00 | -0.44 | 0.00                | 0.00 |       |                      | -0.67 | 0.00  | 0.00    | -0.42 | 0.13  | 0.18    |     |       |                     |     |       |                      |     |  |
| PGC-1B                                                                        | Ppargc1b |       |       | -0.72 | 0.00    | 0.00 | -0.38 | 0.01                | 0.02 |       |                      | -0.71 | 0.00  | 0.00    | -0.36 | 0.00  | 0.00    |     |       |                     |     |       |                      |     |  |
| Tfam                                                                          | Tfam     |       |       | -0.29 | 0.00    | 0.01 | -0.32 | 0.00                | 0.00 |       |                      | -0.28 | 0.00  | 0.00    | -0.30 | 0.00  | 0.00    |     |       |                     |     |       |                      |     |  |
| Tim 22                                                                        | Timm22   |       |       | 0.31  | 0.16    | 0.52 | 0.05  | 0.69                | 0.78 |       |                      | 0.33  | 0.03  | 0.11    | 0.06  | 0.42  | 0.50    |     |       |                     |     |       |                      |     |  |
| Tim 23                                                                        | Timm23   |       |       | -0.47 | 0.00    | 0.00 | -0.50 | 0.00                | 0.00 |       |                      | -0.46 | 0.00  | 0.00    | -0.48 | 0.00  | 0.00    |     |       |                     |     |       |                      |     |  |
| TIMDC1                                                                        | Timmdc1  |       |       | 0.04  | 0.82    | 1.77 | -0.01 | 0.93                | 0.96 |       |                      | 0.07  | 0.63  | 1.40    | 0.01  | 0.86  | 0.90    |     |       |                     |     |       |                      |     |  |
| Tim13                                                                         | Timm13   |       |       | -0.27 | 0.00    | 0.01 | -0.29 | 0.00                | 0.01 |       |                      | -0.26 | 0.00  | 0.00    | -0.28 | 0.00  | 0.00    |     |       |                     |     |       |                      |     |  |
| Tom 40                                                                        | Tomm40   |       |       | -0.03 | 0.89    | 1.86 | 0.08  | 0.45                | 0.58 |       |                      | 0.00  | 0.98  | 1.99    | 0.10  | 0.18  | 0.25    |     |       |                     |     |       |                      |     |  |
| Tom 20                                                                        | Tomm20   |       |       | 0.20  | 0.02    | 0.05 | 0.10  | 0.24                | 0.36 |       |                      | 0.22  | 0.00  | 0.01    | 0.12  | 0.06  | 0.09    |     |       |                     |     |       |                      |     |  |
| TOM22                                                                         | Tomm22   |       |       | 0.42  | 0.00    | 0.00 | 0.50  | 0.00                | 0.00 |       |                      | 0.43  | 0.00  | 0.00    | 0.52  | 0.00  | 0.00    |     |       |                     |     |       |                      |     |  |
| CI - Ubiquinone oxidoreductase subunit A13                                    | Ndufa13  |       |       | -0.85 | 0.00    | 0.00 | -0.91 | 0.00                | 0.00 |       |                      | -0.83 | 0.00  | 0.00    | -0.89 | 0.00  | 0.00    |     |       |                     |     |       |                      |     |  |
| CI - Ubiquinone oxidoreductase subunit S1                                     | Ndufs1   |       |       | -1.18 | 0.00    | 0.00 | -1.24 | 0.00                | 0.00 |       |                      | -1.16 | 0.00  | 0.00    | -1.22 | 0.00  | 0.00    |     |       |                     |     |       |                      |     |  |
| CI - Ubiquinone oxidoreductase subunit V1                                     | Ndufv1   |       |       | -0.96 | 0.00    | 0.00 | -1.08 | 0.00                | 0.00 |       |                      | -0.95 | 0.00  | 0.00    | -1.06 | 0.00  | 0.00    |     |       |                     |     |       |                      |     |  |
| CI - NADH dehydrogenase 3, mitochondrial                                      | mt-Nd3   |       |       | -2.09 | 0.22    | 0.67 | -1.19 | 0.12                | 0.21 |       |                      | -2.07 | 0.06  | 0.18    | -1.15 | 0.02  | 0.04    |     |       |                     |     |       |                      |     |  |
| CI - NADH dehydrogenase 2, mitochondrial                                      | mt-Nd2   |       |       | -1.63 | 0.00    | 0.00 | -1.72 | 0.00                | 0.00 |       |                      | -1.61 | 0.00  | 0.00    | -1.70 | 0.00  | 0.00    |     |       |                     |     |       |                      |     |  |
| CI - succinate dehydrogenase complex, subunit A, flavoprotein                 | Sdha     |       |       | -1.40 | 0.00    | 0.00 | -1.45 | 0.00                | 0.00 |       |                      | -1.39 | 0.00  | 0.00    | -1.43 | 0.00  | 0.00    |     |       |                     |     |       |                      |     |  |
| CI - succinate dehydrogenase complex, subunit B, flavoprotein                 | Sdhb     |       |       | -0.97 | 0.00    | 0.00 | -1.05 | 0.00                | 0.00 |       |                      | -0.95 | 0.00  | 0.00    | -1.04 | 0.00  | 0.00    |     |       |                     |     |       |                      |     |  |
| CI - succinate dehydrogenase complex, subunit C, flavoprotein                 | Sdhc     |       |       | -0.94 | 0.00    | 0.00 | -0.99 | 0.00                | 0.00 |       |                      | -0.92 | 0.00  | 0.00    | -0.97 | 0.00  | 0.00    |     |       |                     |     |       |                      |     |  |
| CI - succinate dehydrogenase complex assembly factor 1                        | Sdhaf1   |       |       | 0.00  | 1.00    | 2.00 | 0.00  | 0.99                | 1.00 |       |                      | 0.02  | 0.90  | 1.87    | 0.02  | 0.83  | 0.87    |     |       |                     |     |       |                      |     |  |
| CI - succinate dehydrogenase complex assembly factor 2                        | Sdhaf2   |       |       | -0.14 | 0.45    | 1.17 | 0.07  | 0.51                | 0.63 |       |                      | -0.12 | 0.35  | 0.87    | 0.08  | 0.22  | 0.29    |     |       |                     |     |       |                      |     |  |
| CI - ubiquinol cytochrome c reductase core protein 2                          | Uqcrc2   |       |       | -0.77 | 0.00    | 0.00 | -0.81 | 0.00                | 0.00 |       |                      | -0.76 | 0.00  | 0.00    | -0.79 | 0.00  | 0.00    |     |       |                     |     |       |                      |     |  |
| CI - ubiquinol-cytochrome c reductase, Rieske iron-sulfur polypeptide 1       | Uqcrc1   |       |       | -0.73 | 0.00    | 0.00 | -0.84 | 0.00                | 0.00 |       |                      | -0.72 | 0.00  | 0.00    | -0.82 | 0.00  | 0.00    |     |       |                     |     |       |                      |     |  |
| CI - ubiquinol-cytochrome c reductase, complex III subunit VII                | Uqcrcq   |       |       | -0.73 | 0.00    | 0.00 | -0.89 | 0.00                | 0.00 |       |                      | -0.72 | 0.00  | 0.00    | -0.87 | 0.00  | 0.00    |     |       |                     |     |       |                      |     |  |
| CI - ubiquinol-cytochrome c reductase core protein 1                          | Uqcrc1   |       |       | -1.24 | 0.00    | 0.00 | -1.27 | 0.00                | 0.00 |       |                      | -1.23 | 0.00  | 0.00    | -1.25 | 0.00  | 0.00    |     |       |                     |     |       |                      |     |  |
| CI - cytochrome b, mitochondrial                                              | mt-Cytb  |       |       | -1.01 | 0.00    | 0.00 | -1.17 | 0.00                | 0.00 |       |                      | -1.00 | 0.00  | 0.00    | -1.15 | 0.00  | 0.00    |     |       |                     |     |       |                      |     |  |
| CIV - SCO2 cytochrome c oxidase assembly protein                              | Sco2     |       |       | 0.71  | 0.04    | 0.16 | 0.63  | 0.00                | 0.00 |       |                      | 0.37  | 0.01  | 0.02    | 0.64  | 0.00  | 0.00    |     |       |                     |     |       |                      |     |  |
| CIV - SCO1 cytochrome c oxidase assembly protein                              | Sco1     |       |       | 0.60  | 0.07    | 0.25 | 0.32  | 0.05                | 0.10 |       |                      | 0.31  | 0.01  | 0.02    | 0.33  | 0.00  | 0.01    |     |       |                     |     |       |                      |     |  |
| CIV - cytochrome c oxidase I, mitochondrial                                   | mt-Co1   |       |       | -1.23 | 0.00    | 0.00 | -1.33 | 0.00                | 0.00 |       |                      | -1.22 | 0.00  | 0.00    | -1.31 | 0.00  | 0.00    |     |       |                     |     |       |                      |     |  |
| CIV - cytochrome oxidase subunit III                                          | mt-Co3   |       |       | -1.24 | 0.00    | 0.00 | -1.36 | 0.00                | 0.00 |       |                      | -1.22 | 0.00  | 0.00    | -1.35 | 0.00  | 0.00    |     |       |                     |     |       |                      |     |  |
| CIV - cytochrome c oxidase subunit 4I2                                        | Cox4i2   |       |       | -1.56 | 0.04    | 0.17 | -0.90 | 0.02                | 0.04 |       |                      | -0.76 | 0.00  | 0.01    | -0.87 | 0.00  | 0.00    |     |       |                     |     |       |                      |     |  |
| CV - ATP synthase, H+ transporting, mitochondrial F1 complex, alpha subunit 1 | Atp5a1   |       |       | -1.12 | 0.00    | 0.00 | -1.17 | 0.00                | 0.00 |       |                      | -1.11 | 0.00  | 0.00    | -1.15 | 0.00  | 0.00    |     |       |                     |     |       |                      |     |  |
| CV - ATP synthase mitochondrial F1 complex assembly factor 1                  | Atpaf1   |       |       | -0.72 | 0.00    | 0.00 | -0.70 | 0.00                | 0.00 |       |                      | -0.71 | 0.00  | 0.00    | -0.68 | 0.00  | 0.00    |     |       |                     |     |       |                      |     |  |
| CV - ATP synthase mitochondrial F1 complex assembly factor 2                  | Atpaf2   |       |       | -0.49 | 0.00    | 0.00 | -0.45 | 0.00                | 0.00 |       |                      | -0.47 | 0.00  | 0.00    | -0.43 | 0.00  | 0.00    |     |       |                     |     |       |                      |     |  |
| CV - ATP synthase, H+ transporting, mitochondrial F1 complex, delta subunit   | Atp5d    |       |       | -0.43 | 0.00    | 0.00 | -0.51 | 0.00                | 0.00 |       |                      | -0.42 | 0.00  | 0.00    | -0.49 | 0.00  | 0.00    |     |       |                     |     |       |                      |     |  |
| CV - ATP synthase 8, mitochondrial                                            | mt-Atp8  |       |       | -1.85 | 0.18    | 0.56 | -1.37 | 0.11                | 0.18 |       |                      | -1.77 | 0.05  | 0.15    | -1.31 | 0.02  | 0.03    |     |       |                     |     |       |                      |     |  |
| Beclin1                                                                       | Becn1    |       |       | -0.14 | 0.41    | 1.09 | -0.22 | 0.01                | 0.03 |       |                      | -0.12 | 0.33  | 0.83    | -0.20 | 0.01  | 0.01    |     |       |                     |     |       |                      |     |  |
| ULK1                                                                          | Ulk1     |       |       | -0.41 | 0.00    | 0.00 | -0.75 | 0.00                | 0.00 |       |                      | -0.40 | 0.00  | 0.00    | -0.73 | 0.00  | 0.00    |     |       |                     |     |       |                      |     |  |
| Atg5                                                                          | Atg5     |       |       | 0.37  | 0.16    | 0.52 | 0.05  | 0.72                | 0.81 |       |                      | 0.20  | 0.03  | 0.05    | 0.07  | 0.45  | 0.53    |     |       |                     |     |       |                      |     |  |
| Atg7                                                                          | Atg7     |       |       | 0.82  | 0.00    | 0.00 | 0.76  | 0.00                | 0.00 |       |                      | 0.83  | 0.00  | 0.00    | 0.78  | 0.00  | 0.00    |     |       |                     |     |       |                      |     |  |
| Atg12                                                                         | Atg12    |       |       | 0.38  | 0.00    | 0.00 | 0.22  | 0.04                | 0.07 |       |                      | 0.40  | 0.00  | 0.00    | 0.24  | 0.00  | 0.01    |     |       |                     |     |       |                      |     |  |
| LC3 - microtubule-associated protein 1 light chain 3 alpha                    | Map1lc3a |       |       | 1.59  | 0.00    | 0.00 | 1.25  | 0.00                | 0.00 |       |                      | 1.60  | 0.00  | 0.00    | 1.26  | 0.00  | 0.00    |     |       |                     |     |       |                      |     |  |
| LC3 - microtubule-associated protein 1 light chain 3 beta                     | Map1lc3b |       |       | -0.25 | 0.11    | 0.39 | -0.32 | 0.00                | 0.00 |       |                      | -0.23 | 0.07  | 0.23    | -0.30 | 0.00  | 0.00    |     |       |                     |     |       |                      |     |  |
| p62                                                                           | Sqstm1   |       |       | 0.82  | 0.00    | 0.00 | 0.51  | 0.00                | 0.00 |       |                      | 0.83  | 0.00  | 0.00    | 0.53  | 0.00  | 0.00    |     |       |                     |     |       |                      |     |  |
| Parkin                                                                        | Prkn     |       |       | 0.97  | 0.00    | 0.00 | 0.88  | 0.00                | 0.00 |       |                      | 0.98  | 0.00  | 0.00    | 0.90  | 0.00  | 0.00    |     |       |                     |     |       |                      |     |  |
| PINK1                                                                         | Pink1    |       |       | -1.48 | 0.00    | 0.00 | -1.59 | 0.00                | 0.00 |       |                      | -1.47 | 0.00  | 0.00    | -1.57 | 0.00  | 0.00    |     |       |                     |     |       |                      |     |  |
| FoxO1                                                                         | Foxo1    |       |       | 0.68  | 0.00    | 0.00 | 0.03  | 0.82                | 0.88 |       |                      | 0.69  | 0.00  | 0.00    | 0.03  | 0.86  | 0.89    |     |       |                     |     |       |                      |     |  |
| FoxO3                                                                         | Foxo3    |       |       | 0.37  | 0.09    | 0.31 | 0.03  | 0.78                | 0.86 |       |                      | 0.19  | 0.01  | 0.02    | 0.05  | 0.54  | 0.61    |     |       |                     |     |       |                      |     |  |
| TFEB                                                                          | Tfeb     |       |       | -1.43 | 0.00    | 0.00 | -1.59 | 0.00                | 0.00 |       |                      | -1.42 | 0.00  | 0.00    | -1.57 | 0.00  | 0.00    |     |       |                     |     |       |                      |     |  |
| TFE3                                                                          | Tfe3     |       |       | 0.37  | 0.22    | 0.66 | 0.05  | 0.76                | 0.84 |       |                      | 0.40  | 0.05  | 0.17    | 0.07  | 0.48  | 0.56    |     |       |                     |     |       |                      |     |  |
| Mucolin1                                                                      | Mcoln1   |       |       | -0.12 | 0.61    | 1.45 | -0.09 | 0.46                | 0.59 |       |                      | -0.10 | 0.53  | 1.22    | -0.07 | 0.36  | 0.44    |     |       |                     |     |       |                      |     |  |
| Cathepsin D                                                                   | Ctsd     |       |       | 1.16  | 0.00    | 0.00 | 1.04  | 0.00                | 0.00 |       |                      | 1.17  | 0.00  | 0.00    | 1.06  | 0.00  | 0.00    |     |       |                     |     |       |                      |     |  |
| Cathepsin B                                                                   | Ctsb     |       |       | 0.66  | 0.00    | 0.00 | 0.71  | 0.00                | 0.00 |       |                      | 0.67  | 0.00  | 0.00    | 0.73  | 0.00  | 0.00    |     |       |                     |     |       |                      |     |  |
| Lamp1                                                                         | Lamp1    |       |       | -0.23 | 0.00    | 0.00 | -0.38 | 0.00                | 0.00 |       |                      | -0.22 | 0.00  | 0.00    | -0.36 | 0.00  | 0.00    |     |       |                     |     |       |                      |     |  |
| Lamp2                                                                         | Lamp2    |       |       | 0.48  | 0.00    | 0.00 | 0.42  | 0.00                | 0.00 |       |                      | 0.49  | 0.00  | 0.00    | 0.44  | 0.00  | 0.00    |     |       |                     |     |       |                      |     |  |
| ATPase, H+ transporting, lysosomal V0 subunit D2                              | Atp6v0d2 |       |       | 5.25  | 0.00    | 0.00 | 3.72  | 0.00                | 0.00 |       |                      | 4.92  | 0.00  | 0.00    | 3.66  | 0.00  | 0.00    |     |       |                     |     |       |                      |     |  |
| ATPase, H+ transporting, lysosomal V1 subunit E1                              | Atp6v1e1 |       |       | 0.58  | 0.00    | 0.00 | 0.50  | 0.00                | 0.00 |       |                      | 0.59  | 0.00  | 0.00    | 0.52  | 0.00  | 0.00    |     |       |                     |     |       |                      |     |  |
| ATPase, H+ transporting, lysosomal V1 subunit H                               | Atp6v1h  |       |       | 1.13  | 0.00    | 0.00 | 1.14  | 0.00                | 0.00 |       |                      | 1.14  | 0.00  | 0.00    | 1.16  | 0.00  | 0.00    |     |       |                     |     |       |                      |     |  |
| HSC70                                                                         | Hspa8    |       |       | 0.46  | 0.00    | 0.00 | 0.47  | 0.00                | 0.00 | </    |                      |       |       |         |       |       |         |     |       |                     |     |       |                      |     |  |

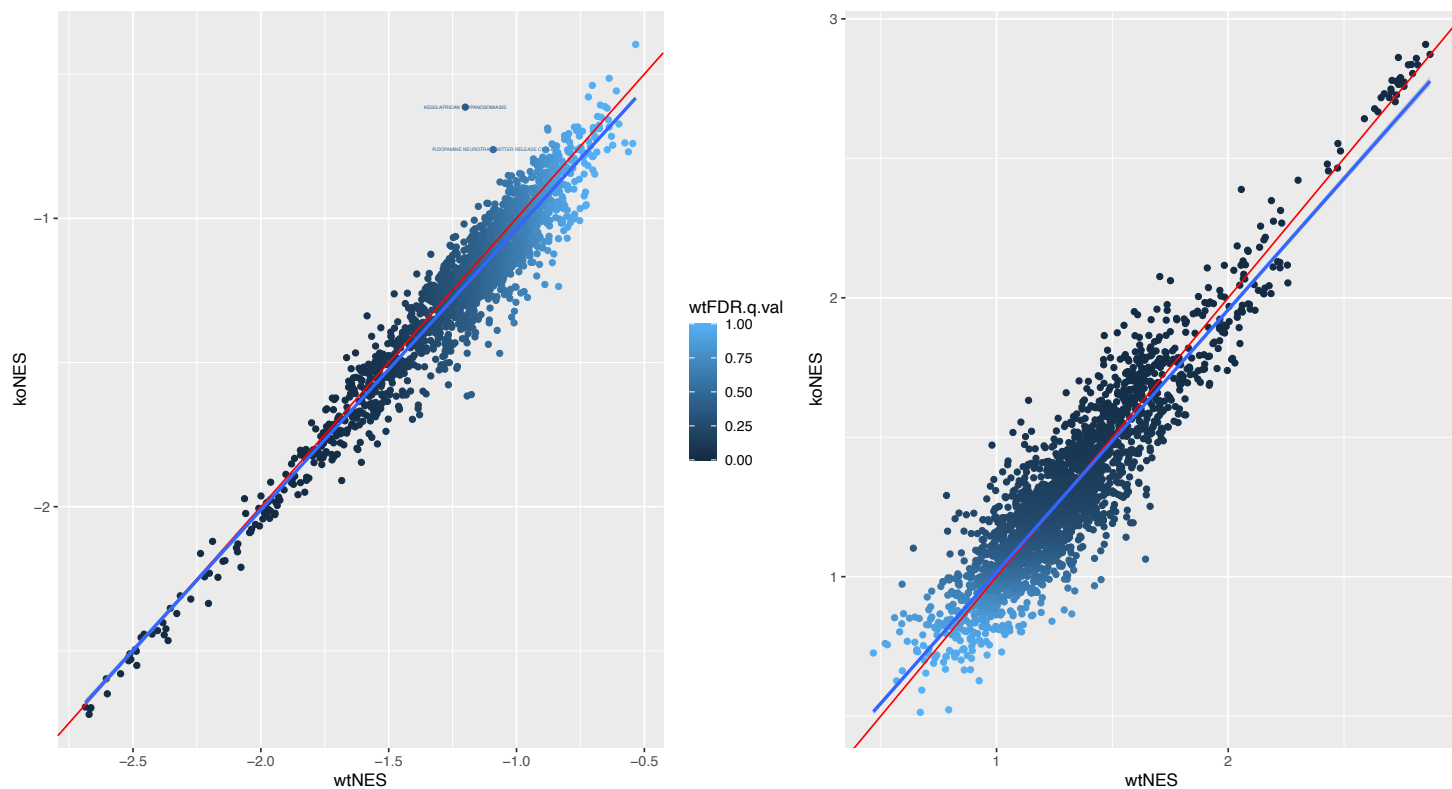

**Figure S6.** A plot of the GSEA normalized enrichment score for the two independent comparisons was generated, which did not reveal any gene-sets with large differences between the two comparisons. Correlation between normalized enrichment scores (NES) for the WT: denervated vs control, and KO: denervated vs control. Red line represents identity, the blue line is the best fit line from linear regression. Top panels: gene-sets with positive NES; Bottom panels: gene-sets with negative NES.



**Table S4.** To test whether genotype affected gene expression differentially in the two treatments, an interaction term was included in the statistical model for detection of differentially expressed genes. GSEA enrichment analysis revealed the top gene sets enriched in up- and down-regulate genes.

**Supplemental Table 4A. The top-ranking gene sets enriched in up-regulated genes**

| GS                                                              | SIZE | ES   | NES  | NOM p-val | FDR q-val | FWER p-val |
|-----------------------------------------------------------------|------|------|------|-----------|-----------|------------|
| GO: extracellular matrix structural constituent                 | 125  | 0.56 | 2.58 | 0.000     | 0.000     | 0.000      |
| GO: collagen trimer                                             | 70   | 0.58 | 2.41 | 0.000     | 0.000     | 0.000      |
| GO: collagen-containing extracellular matrix                    | 271  | 0.47 | 2.41 | 0.000     | 0.000     | 0.000      |
| R: collagen biosynthesis and modifying enzymes                  | 60   | 0.59 | 2.37 | 0.000     | 0.000     | 0.000      |
| R: collagen chain trimerization                                 | 41   | 0.63 | 2.33 | 0.000     | 0.000     | 0.000      |
| KEGG: staphylococcus aureus infection                           | 41   | 0.63 | 2.32 | 0.000     | 0.000     | 0.001      |
| R: collagen formation                                           | 79   | 0.54 | 2.31 | 0.000     | 0.000     | 0.001      |
| GO: extracellular matrix                                        | 378  | 0.43 | 2.27 | 0.000     | 0.000     | 0.002      |
| GO: myeloid leukocyte mediated immunity                         | 79   | 0.51 | 2.16 | 0.000     | 0.002     | 0.015      |
| R: assembly of collagen fibrils and other multimeric structures | 51   | 0.55 | 2.15 | 0.000     | 0.002     | 0.017      |
| R: extracellular matrix organization                            | 247  | 0.43 | 2.15 | 0.000     | 0.002     | 0.018      |
| KEGG: glycosaminoglycan degradation                             | 16   | 0.73 | 2.14 | 0.000     | 0.002     | 0.021      |
| R: homologous dna pairing and strand exchange                   | 40   | 0.57 | 2.09 | 0.000     | 0.003     | 0.047      |
| GO: granulocyte migration                                       | 106  | 0.46 | 2.07 | 0.000     | 0.004     | 0.058      |
| GO: chromosome separation                                       | 83   | 0.48 | 2.06 | 0.000     | 0.004     | 0.065      |
| GO: negative regulation of nuclear division                     | 58   | 0.51 | 2.06 | 0.000     | 0.004     | 0.071      |
| GO: phagocytosis                                                | 163  | 0.43 | 2.06 | 0.000     | 0.004     | 0.073      |
| R: chemokine receptors bind chemokines                          | 30   | 0.59 | 2.05 | 0.000     | 0.004     | 0.079      |
| GO: antigen processing and presentation of peptide antigen      | 46   | 0.53 | 2.03 | 0.000     | 0.005     | 0.108      |
| GO: metaphase/anaphase transition of cell cycle                 | 56   | 0.51 | 2.02 | 0.000     | 0.006     | 0.121      |

**Supplemental Table 4B. The top-ranking gene sets enriched in down-regulated genes**

| GS                                                       | SIZE | ES    | NES   | NOM p-val | FDR q-val | FWER p-val |
|----------------------------------------------------------|------|-------|-------|-----------|-----------|------------|
| R: foxo-mediated transcription of cell cycle genes       | 16   | -0.8  | -2.32 | 0.000     | 0.000     | 0.001      |
| R: autophagy                                             | 118  | -0.5  | -2.23 | 0.000     | 0.001     | 0.003      |
| GO: autophagosome                                        | 63   | -0.55 | -2.23 | 0.000     | 0.001     | 0.004      |
| GO: fatty acid catabolic process                         | 82   | -0.53 | -2.21 | 0.000     | 0.001     | 0.004      |
| R: constitutive signaling by akt1 e17k in cancer         | 26   | -0.67 | -2.2  | 0.000     | 0.001     | 0.007      |
| R: macroautophagy                                        | 105  | -0.5  | -2.19 | 0.000     | 0.001     | 0.007      |
| GO: polyubiquitin modification-dependent protein binding | 48   | -0.58 | -2.18 | 0.000     | 0.001     | 0.009      |
| GO: autophagosome assembly                               | 88   | -0.52 | -2.18 | 0.000     | 0.001     | 0.010      |
| GO: lipid oxidation                                      | 88   | -0.51 | -2.17 | 0.000     | 0.001     | 0.012      |
| GO: ubiquitin binding                                    | 69   | -0.53 | -2.17 | 0.000     | 0.001     | 0.013      |
| GO: macroautophagy                                       | 184  | -0.45 | -2.16 | 0.000     | 0.001     | 0.013      |
| GO: autophagosome organization                           | 92   | -0.5  | -2.16 | 0.000     | 0.001     | 0.013      |
| KEGG: oxidative phosphorylation                          | 123  | -0.48 | -2.16 | 0.000     | 0.001     | 0.013      |
| KEGG: mitophagy - animal                                 | 65   | -0.53 | -2.13 | 0.000     | 0.001     | 0.020      |
| GO: mitochondrion disassembly                            | 62   | -0.53 | -2.13 | 0.000     | 0.001     | 0.020      |
| GO: fatty acid oxidation                                 | 86   | -0.5  | -2.13 | 0.000     | 0.001     | 0.020      |
| GO: regulation of tor signaling                          | 89   | -0.5  | -2.13 | 0.000     | 0.001     | 0.021      |
| GO: respiratory chain                                    | 87   | -0.5  | -2.13 | 0.000     | 0.001     | 0.022      |
| GO: autophagy of mitochondrion                           | 62   | -0.53 | -2.12 | 0.000     | 0.001     | 0.023      |

**Table S5.** Linear regression analysis comparing the fold-change (FC) in whole muscle (WM) LC3-II or p62 protein expression with the fold-change in autophagy flux measured via LC3-II or p62 accumulation. Comparisons were derived from previously published work cited within column from our laboratory, in which flux was measured using either colchicine injections or bafilomycin A treatment in order to block lysosomal degradation of the autophagosome.

| Referenced Paper                                                       | Conditions                                                                 | Model | Flux Measure            | Comparison        | LC3-II            |            | p62            |            |
|------------------------------------------------------------------------|----------------------------------------------------------------------------|-------|-------------------------|-------------------|-------------------|------------|----------------|------------|
|                                                                        |                                                                            |       |                         |                   | FC in Protein     | FC in Flux | FC in Protein  | FC in Flux |
| (13) Vainshtein, A. et al. <i>Skelet. Muscle.</i> , 2015               | - 7d Denervation<br>- PGC-1a KO vs WT                                      | Mice  | Colchicine injections   | WT: Den / Con     | 2.8               | 0.4        | 1.5            | 0.5        |
|                                                                        |                                                                            |       |                         | KO: Den / Con     | 2.2               | 0.1        | 0.7            | >3         |
|                                                                        |                                                                            |       |                         | KO: Con / WT Con  | 0.7               | 0.6        | 1.3            | 0.1        |
|                                                                        |                                                                            |       |                         | KO: Den / WT Den  | 0.5               | 1.1        | 0.6            | 1.4        |
| (46) Vainshtein, A. et al. <i>Am. J. Physiol. Cell Physiol.</i> , 2015 | - PGC-1a KO vs WT<br>- Acute Exercise (Ex)<br>- Acute Ex + Recovery (Ex+R) | Mice  | Colchicine injections   | WT: Ex / Con      | 2.1               | 1.7        | 0.9            | 1.2        |
|                                                                        |                                                                            |       |                         | WT: Ex+R/Con      | 1.5               | 1.9        | 1.7            | 1.4        |
|                                                                        |                                                                            |       |                         | KO: Ex / Con      | 0.7               | 1.4        | 1.5            | 1.4        |
|                                                                        |                                                                            |       |                         | KO: Ex+R / Con    | 1.7               | 0.5        | 1.8            | 1.0        |
|                                                                        |                                                                            |       |                         | KO: Ex+R / Ex     | 2.4               | 0.4        | 1.2            | 0.7        |
|                                                                        |                                                                            |       |                         | Con: KO / WT      | 1.1               | 0.9        | 0.9            | 1.0        |
| (47) Parousis, A. et al. <i>Autophagy</i> , 2016                       | - Chronic Contractile Activity                                             | C2C12 | Bafilomycin A treatment | CCA / Con         | -                 | -          | 1.2            | 0.6        |
| (48) Carter, H.N. et al. <i>J. Physiol.</i> , 2018                     | - Aged vs Young<br>- 7d Chronic Contractile Activity                       | Rats  | Colchicine injections   | Young: CCA / Con  | 1.26              | 0.8        | -              | -          |
|                                                                        |                                                                            |       |                         | Con: Aged / Young | 1.5               | 1.3        | -              | -          |
|                                                                        |                                                                            |       |                         | Aged: CCA / Con   | 1.18              | 1.0        | -              | -          |
| (49) Kim, Y et al. <i>Pflügers Arch.</i> , 2018                        | - 1, 2, 5, & 7-days of Chronic Contractile Activity                        | Rats  | Colchicine injections   | 1d CCA / Con      | 0.7               | 2.2        | 0.6            | 1.6        |
|                                                                        |                                                                            |       |                         | 2d CCA / Con      | 0.5               | 2.2        | 1.8            | 0.7        |
|                                                                        |                                                                            |       |                         | 5d CCA / Con      | 0.4               | 2.4        | 1.5            | 0.8        |
|                                                                        |                                                                            |       |                         | 7d CCA / Con      | 0.4               | 2.3        | 1.3            | 1.4        |
| (50) Triolo, M. et al. <i>J. Physiol.</i> , 2022                       | - 1, 3, & 7d Denervation                                                   | Mice  | Colchicine injections   | 1d Den / Con      | 1.1               | 1.3        | 1.2            | 0.9        |
|                                                                        |                                                                            |       |                         | 3d Den / Con      | 1.3               | 1.9        | 3.4            | 0.7        |
|                                                                        |                                                                            |       |                         | 7d Den / Con      | 2.1               | 0.7        | 2.3            | 0.1        |
| <b>WM LC3-II vs LC3-II Flux</b>                                        |                                                                            |       |                         |                   | <b>R2 = 0.408</b> |            | <b>p=0.002</b> |            |
| <b>WM p62 vs p62 Flux</b>                                              |                                                                            |       |                         |                   | <b>R2 = 0.221</b> |            | <b>p=0.049</b> |            |
